# Supplementary material
Source: PubMed Central journal article supplement (PMC3553749)
Supplement: AEM.02747-12_zam999104029so1.pdf [file AEM.02747-12_zam999104029so1.pdf]

1 **Table S1.** List of primers and barcode sequences used in this study.

| SampleID | Barcode Sequence | Linker Primer Sequence |
|----------|------------------|------------------------|
| H1       | TACTCTCGTG       | CCTAYGGGRBGCASCAG      |
| H2       | TAGAGACGAG       | CCTAYGGGRBGCASCAG      |
| H3       | TCGTCGCTCG       | CCTAYGGGRBGCASCAG      |
| A1       | ACATACGCGT       | CCTAYGGGRBGCASCAG      |
| A2       | ACGCGAGTAT       | CCTAYGGGRBGCASCAG      |
| B1       | ACTACTATGT       | CCTAYGGGRBGCASCAG      |
| B2       | ACTGTACAGT       | CCTAYGGGRBGCASCAG      |
| B3       | AGACTATACT       | CCTAYGGGRBGCASCAG      |
| B4       | AGCGTCGTCT       | CCTAYGGGRBGCASCAG      |
| C1       | AGTACGCTAT       | CCTAYGGGRBGCASCAG      |
| C2       | ATAGAGTACT       | CCTAYGGGRBGCASCAG      |
| C3       | CACGCTACGT       | CCTAYGGGRBGCASCAG      |
| D1       | CAGTAGACGT       | CCTAYGGGRBGCASCAG      |
| D2       | CGACGTGACT       | CCTAYGGGRBGCASCAG      |
| D3       | TACACACACT       | CCTAYGGGRBGCASCAG      |
| D4       | TACACGTGAT       | CCTAYGGGRBGCASCAG      |
| D5       | TACAGATCGT       | CCTAYGGGRBGCASCAG      |
| E1       | TACGCTGTCT       | CCTAYGGGRBGCASCAG      |
| E2       | TAGTGTAGAT       | CCTAYGGGRBGCASCAG      |
| G1       | TCTAGCGACT       | CCTAYGGGRBGCASCAG      |
| G2       | TCTATACTAT       | CCTAYGGGRBGCASCAG      |
| G3       | TGACGTATGT       | CCTAYGGGRBGCASCAG      |
| F1       | ACAGTATATA       | CCTAYGGGRBGCASCAG      |
| F2       | ACGCGATCGA       | CCTAYGGGRBGCASCAG      |
| I1       | TCGATCACGT       | CCTAYGGGRBGCASCAG      |
| I2       | TCGCACTAGT       | CCTAYGGGRBGCASCAG      |

2 **Table S2.** Relative abundance of major phyla in each sample used for Figure 3.

| Taxon                   | A1   | A2   | B1   | B2   | B3   | B4   | C1   | C2   | C3   | D1   | D2   | D3   | D4   | D5   | E1   | E2   | F1   | F2   | G1   | G2   | G3   | H1   | H2   | H3   | I1   | I2   | mean |
|-------------------------|------|------|------|------|------|------|------|------|------|------|------|------|------|------|------|------|------|------|------|------|------|------|------|------|------|------|------|
| Crenarchaeota           | 0.0  | 0.0  | 0.2  | 0.0  | 0.0  | 0.0  | 0.2  | 0.2  | 0.1  | 0.0  | 0.0  | 0.6  | 1.8  | 0.5  | 0.1  | 0.0  | 0.2  | 0.0  | 0.9  | 0.2  | 0.4  | 0.1  | 0.3  | 0.4  | 0.9  | 0.2  | 0.3  |
| Euryarchaeota           | 36.2 | 0.4  | 0.2  | 7.0  | 7.5  | 16.0 | 0.1  | 0.1  | 16.4 | 0.2  | 0.0  | 28.0 | 1.1  | 37.5 | 3.3  | 3.8  | 0.2  | 1.6  | 0.1  | 0.0  | 0.1  | 0.1  | 0.1  | 0.1  | 0.0  | 0.0  | 6.2  |
| Unclassified archaea    | 0.1  | 0.1  | 1.8  | 0.2  | 0.2  | 0.1  | 0.1  | 0.6  | 0.1  | 0.2  | 1.9  | 5.2  | 11.3 | 1.7  | 3.1  | 0.0  | 0.1  | 0.0  | 0.8  | 0.3  | 0.8  | 0.1  | 1.1  | 3.9  | 0.5  | 0.1  | 1.3  |
| Acidobacteria           | 0.1  | 2.5  | 14.2 | 0.7  | 2.0  | 1.6  | 8.3  | 7.7  | 2.1  | 7.7  | 13.7 | 3.6  | 2.8  | 5.2  | 6.7  | 1.3  | 11.1 | 1.8  | 10.8 | 9.7  | 7.9  | 10.9 | 14.6 | 3.6  | 21.4 | 0.6  | 6.6  |
| Actinobacteria          | 2.4  | 16.4 | 10.8 | 5.6  | 4.7  | 13.2 | 14.0 | 11.3 | 12.8 | 8.0  | 7.6  | 2.1  | 1.0  | 2.2  | 5.3  | 9.2  | 13.4 | 13.5 | 13.1 | 14.5 | 18.0 | 14.5 | 11.1 | 0.4  | 6.2  | 10.3 | 9.3  |
| BRC1                    | 0.0  | 0.0  | 0.0  | 0.0  | 0.0  | 0.0  | 0.0  | 0.0  | 0.0  | 0.0  | 0.0  | 0.0  | 0.0  | 0.0  | 0.1  | 0.0  | 0.0  | 0.1  | 0.0  | 0.0  | 0.0  | 0.0  | 0.1  | 0.0  | 0.0  | 0.0  | 0.0  |
| Bacteria_incertae_sedis | 0.0  | 0.0  | 0.0  | 0.1  | 0.1  | 0.0  | 0.0  | 0.0  | 0.0  | 0.0  | 0.0  | 0.0  | 0.0  | 0.1  | 0.1  | 0.0  | 0.1  | 0.0  | 0.0  | 0.1  | 0.0  | 0.0  | 1.5  | 0.0  | 1.9  | 0.0  | 0.2  |
| Bacteroidetes           | 0.8  | 0.9  | 1.2  | 0.3  | 1.0  | 0.9  | 3.3  | 1.0  | 0.3  | 1.1  | 1.3  | 2.0  | 4.3  | 1.5  | 0.5  | 2.9  | 0.4  | 4.4  | 0.7  | 2.0  | 3.5  | 2.4  | 2.3  | 7.7  | 0.3  | 0.9  | 1.8  |
| Caldiserica             | 0.2  | 0.0  | 0.0  | 0.0  | 0.0  | 0.2  | 0.0  | 0.0  | 0.0  | 0.0  | 0.0  | 0.0  | 0.0  | 0.0  | 0.0  | 0.0  | 0.0  | 0.0  | 0.0  | 0.0  | 0.0  | 0.0  | 0.0  | 0.0  | 0.0  | 0.0  | 0.0  |
| Chlamydiae              | 0.0  | 0.3  | 1.2  | 0.2  | 0.3  | 0.3  | 0.5  | 0.4  | 0.5  | 0.2  | 0.8  | 0.1  | 0.2  | 0.2  | 0.5  | 0.7  | 0.1  | 0.3  | 0.7  | 0.8  | 0.6  | 0.3  | 0.3  | 1.5  | 0.2  | 0.0  | 0.4  |
| Chloroflexi             | 11.5 | 1.0  | 1.0  | 2.3  | 3.4  | 5.0  | 0.9  | 0.7  | 3.1  | 0.7  | 2.0  | 4.7  | 8.1  | 3.5  | 1.6  | 9.1  | 1.4  | 6.7  | 1.4  | 1.0  | 1.2  | 0.7  | 1.1  | 1.9  | 0.5  | 0.0  | 2.9  |
| Cyanobacteria           | 0.0  | 0.2  | 0.1  | 0.3  | 0.0  | 0.1  | 0.0  | 0.5  | 0.0  | 0.1  | 0.0  | 0.0  | 0.0  | 0.0  | 0.1  | 0.0  | 0.0  | 0.1  | 0.0  | 0.5  | 1.1  | 0.4  | 0.1  | 1.7  | 0.0  | 0.0  | 0.2  |
| Deinococcus-Thermus     | 0.0  | 0.0  | 0.1  | 0.0  | 0.0  | 0.0  | 0.0  | 0.0  | 0.0  | 0.1  | 0.0  | 0.0  | 0.0  | 0.0  | 0.0  | 0.0  | 0.0  | 0.0  | 0.0  | 0.0  | 0.0  | 0.0  | 0.0  | 0.0  | 0.0  | 0.0  | 0.0  |
| Fibrobacteres           | 0.0  | 0.0  | 0.0  | 0.0  | 0.0  | 0.0  | 0.0  | 0.0  | 0.0  | 0.0  | 0.0  | 0.0  | 0.0  | 0.0  | 0.0  | 0.0  | 0.0  | 0.0  | 0.0  | 0.0  | 0.0  | 0.0  | 0.0  | 0.1  | 0.0  | 0.0  | 0.0  |
| Firmicutes              | 6.0  | 24.3 | 2.1  | 46.8 | 25.0 | 13.6 | 16.0 | 7.9  | 16.6 | 1.2  | 3.3  | 1.2  | 1.6  | 4.2  | 1.5  | 0.3  | 5.5  | 5.2  | 5.5  | 9.2  | 7.2  | 3.2  | 3.3  | 12.9 | 7.3  | 3.6  | 9.0  |
| Gemmatimonadetes        | 0.0  | 0.2  | 0.2  | 0.0  | 0.0  | 0.0  | 0.5  | 0.4  | 0.1  | 0.7  | 0.6  | 0.1  | 0.0  | 0.0  | 0.6  | 0.2  | 0.8  | 0.1  | 0.5  | 0.4  | 0.7  | 0.3  | 0.2  | 0.0  | 0.0  | 0.0  | 0.3  |
| Nitrospira              | 0.0  | 0.2  | 0.8  | 0.0  | 0.0  | 0.1  | 0.9  | 0.5  | 0.0  | 0.7  | 0.2  | 0.0  | 0.0  | 0.0  | 0.6  | 0.0  | 0.6  | 0.1  | 1.3  | 0.6  | 0.7  | 0.4  | 0.3  | 0.0  | 0.0  | 0.0  | 0.3  |
| Bacteria;OD1            | 0.2  | 0.0  | 0.4  | 0.1  | 0.0  | 0.0  | 0.1  | 0.1  | 0.1  | 0.4  | 0.4  | 0.1  | 0.1  | 0.5  | 0.3  | 0.3  | 0.1  | 0.1  | 0.4  | 0.4  | 0.4  | 0.3  | 0.3  | 1.6  | 0.1  | 0.0  | 0.3  |
| Bacteria;OP10           | 0.0  | 0.0  | 0.0  | 0.0  | 0.0  | 0.0  | 0.0  | 0.0  | 0.0  | 0.1  | 0.0  | 0.0  | 0.0  | 0.0  | 0.0  | 0.0  | 0.1  | 0.0  | 0.0  | 0.0  | 0.0  | 0.1  | 0.0  | 0.0  | 0.1  | 0.0  | 0.0  |
| Bacteria;OP11           | 0.0  | 0.0  | 0.0  | 0.0  | 0.0  | 0.0  | 0.0  | 0.0  | 0.0  | 0.0  | 0.0  | 0.0  | 0.0  | 0.0  | 0.0  | 0.0  | 0.0  | 0.1  | 0.0  | 0.0  | 0.0  | 0.0  | 0.0  | 0.0  | 0.0  | 0.0  | 0.0  |
| Unclassified bacteria   | 19.9 | 12.3 | 24.4 | 9.8  | 12.4 | 11.8 | 21.7 | 28.4 | 10.3 | 22.3 | 14.6 | 30.6 | 36.2 | 15.4 | 18.6 | 18.8 | 39.2 | 10.2 | 30.3 | 25.2 | 22.6 | 25.5 | 26.5 | 23.7 | 46.3 | 1.5  | 21.5 |
| Planctomycetes          | 0.0  | 0.6  | 1.0  | 0.2  | 0.1  | 0.7  | 1.1  | 0.6  | 0.6  | 0.7  | 0.3  | 0.0  | 0.0  | 0.1  | 0.5  | 1.0  | 0.7  | 0.3  | 1.0  | 1.0  | 1.2  | 0.9  | 0.6  | 0.1  | 0.6  | 0.0  | 0.5  |
| Proteobacteria          | 22.1 | 40.1 | 37.5 | 26.1 | 42.7 | 35.9 | 30.2 | 38.0 | 36.4 | 54.4 | 50.1 | 19.1 | 27.6 | 26.5 | 53.5 | 49.0 | 25.5 | 54.0 | 30.4 | 30.0 | 30.1 | 36.8 | 33.2 | 30.9 | 10.4 | 82.6 | 36.6 |
| SR1                     | 0.0  | 0.0  | 0.0  | 0.0  | 0.0  | 0.0  | 0.0  | 0.0  | 0.0  | 0.0  | 0.0  | 0.0  | 0.0  | 0.0  | 0.0  | 0.0  | 0.0  | 0.0  | 0.0  | 0.0  | 0.0  | 0.0  | 0.0  | 0.0  | 0.0  | 0.0  | 0.0  |
| Spirochaetes            | 0.0  | 0.0  | 0.0  | 0.0  | 0.0  | 0.0  | 0.0  | 0.0  | 0.0  | 0.0  | 0.0  | 0.0  | 0.0  | 0.0  | 0.0  | 0.0  | 0.0  | 0.0  | 0.0  | 0.0  | 0.0  | 0.0  | 0.0  | 0.0  | 0.0  | 0.0  | 0.0  |
| Synergistetes           | 0.2  | 0.0  | 0.0  | 0.0  | 0.0  | 0.1  | 0.0  | 0.0  | 0.0  | 0.0  | 0.0  | 0.0  | 0.0  | 0.1  | 0.0  | 0.0  | 0.0  | 0.2  | 0.0  | 0.0  | 0.0  | 0.0  | 0.0  | 0.0  | 0.0  | 0.0  | 0.0  |
| TM7                     | 0.0  | 0.2  | 0.6  | 0.1  | 0.2  | 0.1  | 0.3  | 0.2  | 0.2  | 0.6  | 0.2  | 0.0  | 0.0  | 0.0  | 0.9  | 1.6  | 0.1  | 0.4  | 0.2  | 0.3  | 0.3  | 0.5  | 0.2  | 2.0  | 0.3  | 0.0  | 0.4  |
| Tenericutes             | 0.0  | 0.0  | 0.0  | 0.0  | 0.0  | 0.0  | 0.0  | 0.0  | 0.0  | 0.0  | 0.0  | 0.0  | 0.0  | 0.0  | 0.0  | 0.0  | 0.0  | 0.0  | 0.0  | 0.0  | 0.0  | 0.0  | 0.0  | 0.0  | 0.0  | 0.0  | 0.0  |
| Verrucomicrobia         | 0.1  | 0.4  | 1.6  | 0.3  | 0.2  | 0.2  | 1.6  | 0.9  | 0.5  | 0.3  | 1.6  | 0.2  | 0.3  | 0.3  | 1.5  | 1.4  | 0.3  | 0.9  | 0.8  | 2.6  | 2.1  | 1.7  | 1.9  | 6.0  | 2.9  | 0.1  | 1.2  |
| WS3                     | 0.0  | 0.0  | 0.1  | 0.0  | 0.0  | 0.1  | 0.1  | 0.3  | 0.0  | 0.0  | 0.0  | 0.0  | 0.0  | 0.0  | 0.1  | 0.2  | 0.3  | 0.0  | 0.1  | 0.4  | 0.2  | 0.8  | 0.7  | 0.0  | 0.0  | 0.0  | 0.1  |
| Unclassified;Other      | 0.1  | 0.0  | 0.5  | 0.0  | 0.0  | 0.1  | 0.1  | 0.3  | 0.0  | 0.3  | 1.3  | 2.1  | 3.4  | 0.4  | 0.7  | 0.1  | 0.1  | 0.1  | 0.9  | 0.6  | 1.0  | 0.1  | 0.3  | 1.6  | 0.1  | 0.0  | 0.5  |

4 **Table S3.** Relative abundance of *Proteobacteria* classes used for Figure 3.

| Taxon                       | A1   | A2   | B1   | B2   | B3   | B4   | C1   | C2   | C3   | D1   | D2   | D3   | D4   | D5   | E1   | E2   | F1  | F2   | G1   | G2   | G3  | H1   | H2   | H3   | I1  | I2   | mean |
|-----------------------------|------|------|------|------|------|------|------|------|------|------|------|------|------|------|------|------|-----|------|------|------|-----|------|------|------|-----|------|------|
| Alphaproteobacteria         | 1.9  | 6.3  | 13.2 | 11.9 | 28.8 | 19.4 | 11.0 | 10.5 | 10.5 | 12.1 | 8.5  | 4.0  | 3.1  | 2.7  | 13.4 | 10.6 | 9.5 | 6.7  | 7.0  | 7.7  | 9.4 | 10.4 | 11.6 | 7.6  | 5.4 | 0.5  | 9.4  |
| Betaproteobacteria          | 6.2  | 23.6 | 5.5  | 10.7 | 3.8  | 4.6  | 6.0  | 5.4  | 12.4 | 2.6  | 12.7 | 1.5  | 1.8  | 5.7  | 26.7 | 16.4 | 5.2 | 14.3 | 11.6 | 11.0 | 9.5 | 13.3 | 9.1  | 12.5 | 1.9 | 73.4 | 11.8 |
| Deltaproteobacteria         | 12.8 | 1.4  | 3.6  | 1.9  | 3.1  | 4.2  | 3.4  | 2.6  | 5.7  | 1.5  | 1.7  | 13.0 | 22.1 | 16.4 | 2.5  | 3.5  | 2.0 | 7.1  | 2.3  | 2.9  | 3.2 | 6.1  | 7.6  | 4.9  | 1.4 | 0.1  | 5.3  |
| Epsilonproteobacteria       | 0.0  | 0.0  | 0.0  | 0.1  | 1.1  | 0.0  | 0.0  | 0.0  | 3.4  | 0.0  | 0.9  | 0.0  | 0.0  | 0.2  | 0.0  | 0.1  | 0.0 | 0.1  | 0.0  | 0.0  | 0.0 | 0.1  | 0.0  | 0.1  | 0.0 | 0.0  | 0.2  |
| Gammaproteobacteria         | 0.6  | 8.1  | 10.3 | 1.3  | 4.9  | 6.5  | 6.0  | 12.8 | 3.2  | 31.5 | 21.8 | 0.1  | 0.2  | 1.0  | 5.6  | 12.8 | 4.7 | 22.7 | 4.8  | 5.5  | 5.2 | 3.1  | 1.9  | 4.3  | 1.3 | 8.5  | 7.3  |
| Unclassified proteobacteria | 0.5  | 0.6  | 4.9  | 0.3  | 1.0  | 1.1  | 3.8  | 6.7  | 1.2  | 6.6  | 4.6  | 0.3  | 0.4  | 0.5  | 5.2  | 5.6  | 4.0 | 3.1  | 4.7  | 2.9  | 2.8 | 3.8  | 3.0  | 1.4  | 0.6 | 0.1  | 2.7  |

5

6

7 **Table S4.** Lineage and total abundance of fifty most prominent operational taxonomic units  
 8 (OTUs).

| #OTU ID | total | % total | Consensus Lineage                                                                             |
|---------|-------|---------|-----------------------------------------------------------------------------------------------|
| 7163    | 8214  | 4.07    | Bacteria;Proteobacteria;Betaproteobacteria;Burkholderiales;Comamonadaceae;Variovorax          |
| 42143   | 6814  | 3.38    | Archaea;Euryarchaeota;Methanomicrobia;Methanosarcinales;Methanosetaceae;Methanosaeta          |
| 42977   | 2993  | 1.48    | Bacteria                                                                                      |
| 64060   | 2857  | 1.42    | Bacteria;Proteobacteria;Alphaproteobacteria;Rhizobiales;Methylocystaceae;Methylocystis        |
| 38964   | 2516  | 1.25    | Bacteria;Proteobacteria;Deltaproteobacteria;Syntrophobacteriales;Syntrophaceae;Smithella      |
| 42889   | 1503  | 0.75    | Bacteria;Proteobacteria;Gammaproteobacteria                                                   |
| 41508   | 1215  | 0.60    | Bacteria;Firmicutes;Bacilli;Bacillales;Bacillaceae;Bacillus                                   |
| 51120   | 1180  | 0.59    | Bacteria;Proteobacteria;Betaproteobacteria                                                    |
| 804     | 1097  | 0.54    | Bacteria                                                                                      |
| 46070   | 1083  | 0.54    | Archaea;Euryarchaeota;Methanomicrobia;Methanosarcinales;Methanosetaceae;Methanosaeta          |
| 17322   | 1066  | 0.53    | Bacteria;Proteobacteria;Alphaproteobacteria;Rhizobiales;Hyphomicrobiaceae                     |
| 36140   | 1065  | 0.53    | Bacteria                                                                                      |
| 50799   | 913   | 0.45    | Bacteria;Proteobacteria;Gammaproteobacteria;Methylococcales;Methylococcaceae;Methylobacter    |
| 49748   | 856   | 0.42    | Archaea;Euryarchaeota;Methanomicrobia;Methanosarcinales;Methanosetaceae;Methanosaeta          |
| 35899   | 807   | 0.40    | Bacteria;Proteobacteria;Gammaproteobacteria;Methylococcales;Methylococcaceae;Methylobacter    |
| 54656   | 788   | 0.39    | Bacteria;Actinobacteria;Actinobacteria;Actinomycetales;Actinomycetaceae;Actinomyces           |
| 44690   | 775   | 0.38    | Bacteria;Proteobacteria                                                                       |
| 45207   | 770   | 0.38    | Archaea                                                                                       |
| 11323   | 766   | 0.38    | Bacteria;Acidobacteria;Holophagae;Holophagales;Holophagaceae                                  |
| 35948   | 726   | 0.36    | Bacteria;Actinobacteria;Actinobacteria;Actinomycetales;Microbacteriaceae;Leifsonia            |
| 10657   | 722   | 0.36    | Archaea;Euryarchaeota;Methanomicrobia;Methanosarcinales;Methanosetaceae;Methanosaeta          |
| 13904   | 715   | 0.35    | Archaea;Euryarchaeota;Methanomicrobia;Methanosarcinales;Methanosetaceae;Methanosaeta          |
| 19827   | 684   | 0.34    | Bacteria;Actinobacteria;Actinobacteria;Actinomycetales;Mycobacteriaceae;Mycobacterium         |
| 50808   | 666   | 0.33    | Bacteria;Firmicutes;Clostridia;Clostridiales;Peptococcaceae;Desulfosporosinus                 |
| 48085   | 642   | 0.32    | Bacteria;Actinobacteria;Actinobacteria;Actinomycetales;Micromonosporaceae                     |
| 44101   | 638   | 0.32    | Bacteria;Actinobacteria;Actinobacteria                                                        |
| 13667   | 626   | 0.31    | Bacteria                                                                                      |
| 62246   | 619   | 0.31    | Bacteria                                                                                      |
| 31313   | 613   | 0.30    | Bacteria;Proteobacteria;Alphaproteobacteria;Rhizobiales;Hyphomicrobiaceae                     |
| 47077   | 611   | 0.30    | Archaea                                                                                       |
| 884     | 499   | 0.25    | Bacteria;Proteobacteria;Deltaproteobacteria;Syntrophobacteriales;Syntrophaceae;Smithella      |
| 56805   | 491   | 0.24    | Bacteria;Actinobacteria;Actinobacteria;Actinomycetales                                        |
| 49398   | 457   | 0.23    | Bacteria;Proteobacteria;Alphaproteobacteria;Rhizobiales;Bradyrhizobiaceae;Bradyrhizobium      |
| 60579   | 447   | 0.22    | Bacteria                                                                                      |
| 25769   | 439   | 0.22    | Bacteria;Proteobacteria;Betaproteobacteria                                                    |
| 8729    | 436   | 0.22    | Bacteria;Chloroflexi;Anaerolineae;Anaerolineales;Anaerolineaceae                              |
| 54563   | 427   | 0.21    | Bacteria;Acidobacteria;Acidobacteria_Gp16;Gp16                                                |
| 20713   | 425   | 0.21    | Bacteria;Proteobacteria;Gammaproteobacteria                                                   |
| 20435   | 416   | 0.21    | Bacteria;Acidobacteria;Acidobacteria_Gp6;Gp6                                                  |
| 61491   | 413   | 0.20    | Archaea                                                                                       |
| 63018   | 407   | 0.20    | Bacteria;Proteobacteria;Alphaproteobacteria;Rhizobiales;Hyphomicrobiaceae;Hyphomicrobium      |
| 33445   | 401   | 0.20    | Bacteria;Proteobacteria;Deltaproteobacteria;Syntrophobacteriales;Syntrophaceae;Smithella      |
| 39599   | 400   | 0.20    | Bacteria;Proteobacteria                                                                       |
| 40430   | 390   | 0.19    | Bacteria;Proteobacteria;Gammaproteobacteria                                                   |
| 11351   | 386   | 0.19    | Bacteria                                                                                      |
| 6715    | 381   | 0.19    | Bacteria;Chloroflexi;Anaerolineae;Anaerolineales;Anaerolineaceae                              |
| 1197    | 380   | 0.19    | Bacteria                                                                                      |
| 61102   | 367   | 0.18    | Bacteria;Proteobacteria;Deltaproteobacteria                                                   |
| 29799   | 365   | 0.18    | Bacteria;Proteobacteria;Epsilonproteobacteria;Campylobacteriales;Helicobacteraceae;Sulfurovum |
| 51936   | 338   | 0.17    | Bacteria;Firmicutes;Clostridia;Clostridiales;Clostridiaceae;Clostridium                       |
