# Supplementary material
Source: PubMed Central journal article supplement (PMC3553749)
Supplement: AEM.02747-12_zam999104029so2.pdf [file AEM.02747-12_zam999104029so2.pdf]

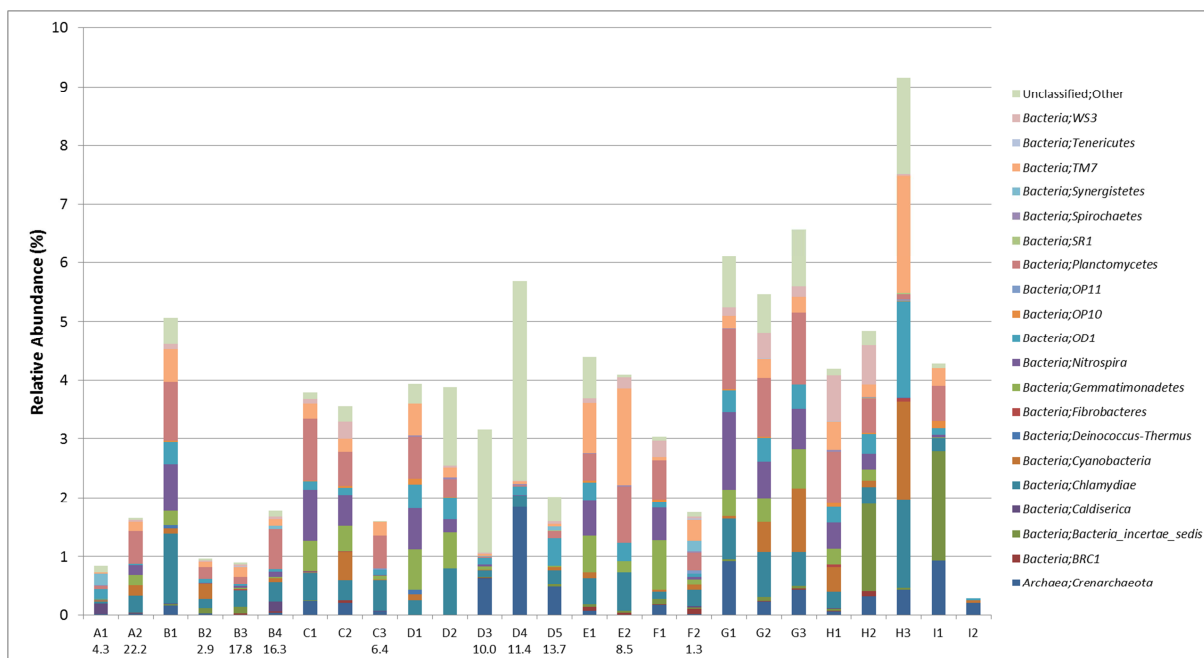

**Figure S1.** Relative abundance of minor microbial phyla (<1% of average abundance for the total pyrosequencing data set). Values below sample names indicate contamination as g TPH/kg soil.
